# Supplementary material
Source: PubMed Central journal article supplement (PMC5679265)
Supplement: NIHMS909312-supplement-supplement_1.pdf [file NIHMS909312-supplement-supplement_1.pdf]

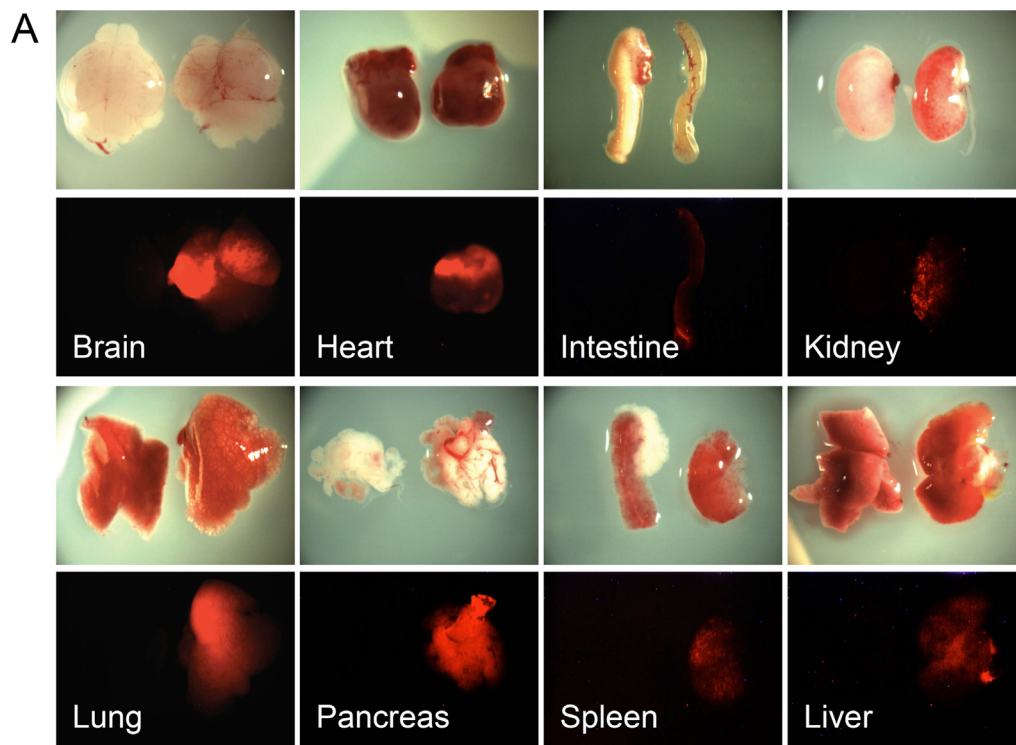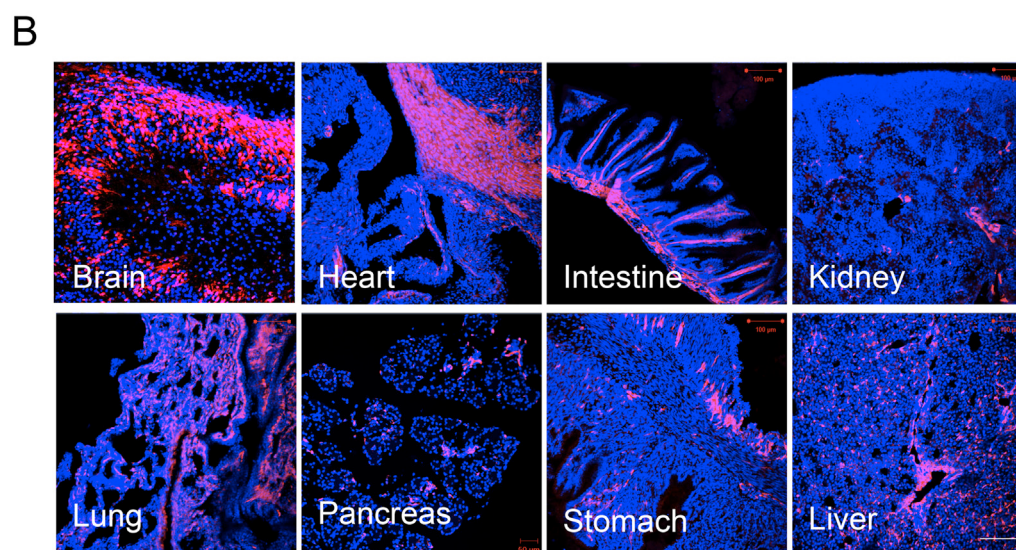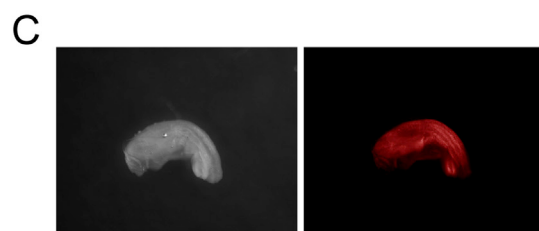

---

**Figure S1. Chimeric Contribution of Rat PSCs to Different Organs of Rat-Mouse Chimeras, Related to Figure 1**

(A) Bright field (top) and fluorescence (bottom) images showing hKO-labeled rat ESCs (DAC8) contributed to different organs of a neonatal rat-mouse chimera. Control organs from a wild-type neonatal mouse were showing on the left.

(B) Representative fluorescence images showing hKO-labeled rat iPSCs (SDFF) contributed to different tissues in a 3-week-old rat-mouse chimera. Red, hKO-labeled rat cells; blue, DAPI. Scale bar is 100  $\mu$ m.

(C) Bright field (left) and fluorescence (right) images showing an isolated neonatal mouse gallbladder contributed by hKO-labeled rat iPSCs (SDFE), as shown in Figure 1F.

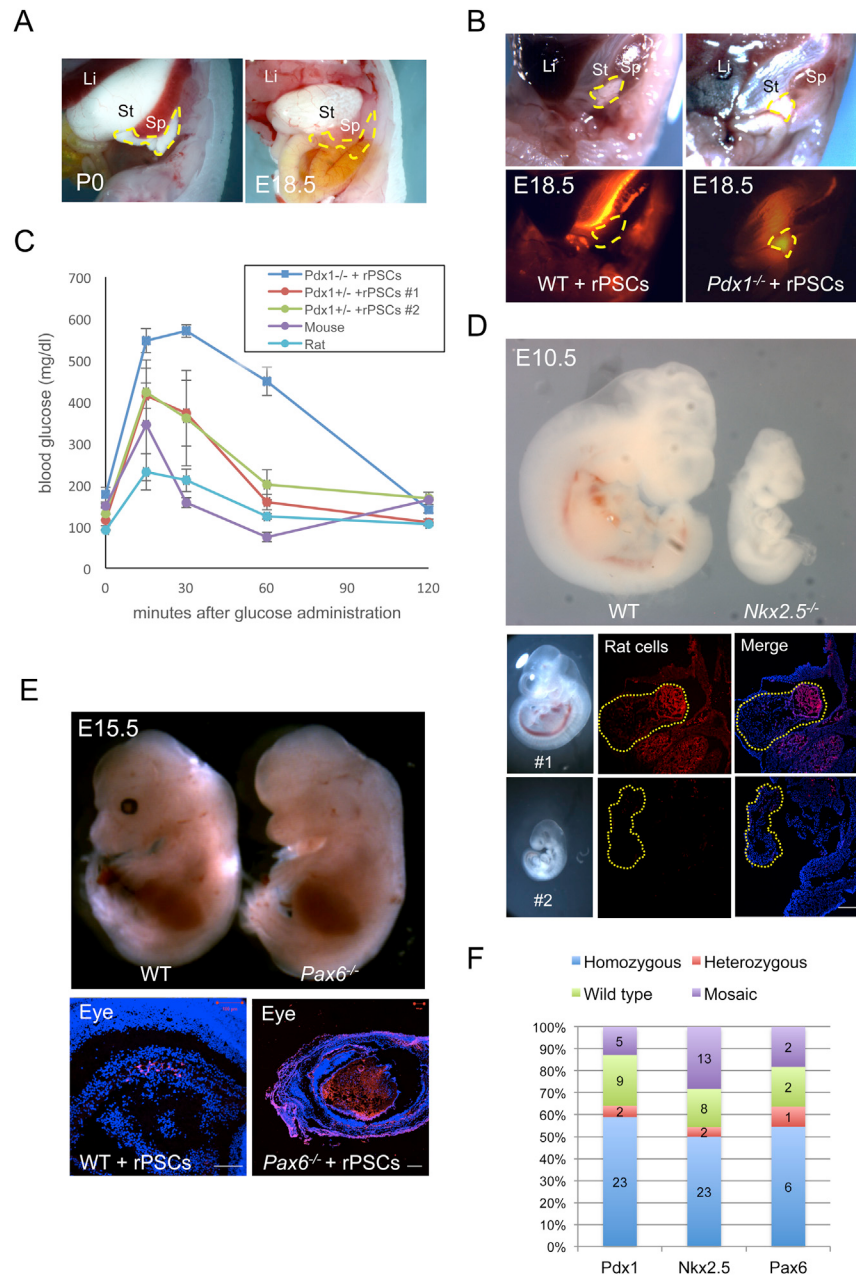

**Figure S2. CRISPR-Cas9-Mediated Rat-Mouse Blastocyst Complementation, Related to Figure 2**

(A) Bright field images showing a wild type (P0, left) mouse and a *Pdx1*<sup>-/-</sup> (E18.5, right) mouse fetus generated by zygotic co-injection of Cas9 mRNA and *Pdx1* sgRNA. Li, liver; St, stomach; Sp, spleen. Yellow-dotted line encircles the pancreas in the wild type, and indicates the lack of a pancreas in the *Pdx1*<sup>-/-</sup> fetus.

(B) Bright field (top) and fluorescence (bottom) images showing more chimeric contribution of rat cells in a *Pdx1*<sup>-/-</sup> mouse pancreas than a wild type mouse pancreas. Li, liver; St, stomach; Sp, spleen. Yellow-dotted line encircles the pancreases. Red, hKO-labeled rat cells.

(C) Glucose tolerance test results of adult (>7 months) *Pdx1*<sup>-/-</sup> and *Pdx1*<sup>+/-</sup> mice complemented with rat PSCs. Age-matched wild type mice and rats were included as controls. Error bars indicate s.d.

(D) Top, a representative bright field image showing a wild type (left) and *Nkx2.5*<sup>-/-</sup> (right) E10.5 mouse embryos. Middle, rat ESC-derivatives rescued retarded growth of E10.5 *Nkx2.5*<sup>-/-</sup> mouse embryo and were enriched in the heart. H, heart. Bottom, an E10.5 *Nkx2.5*<sup>-/-</sup> embryo showing retarded growth with little to no rat cells contribution to the heart. Yellow-dotted line encircles the heart. Scale bar is 100μm.

(E) Top, a representative bright field image showing a wild type (left) and a *Pax6*<sup>-/-</sup> (right) E15.5 mouse fetuses. Bottom, fluorescence images showing more chimeric contribution of rat cells in the eye of *Pax6*<sup>-/-</sup> (right) than wild type (left) chimeras. WT+rPSCs, control rat-mouse chimera without Cas9/sgRNA injection. Red, hKO-labeled rat cells. Blue, DAPI. Scale bar is 100μm.

(F) Frequencies of wild type, homozygous, heterozygous mutants and mosaic mutant mice generated by zygotic co-injection of Cas9 mRNA and sgRNAs for *Pdx1*, *Nkx2.5*, or *Pax6*.

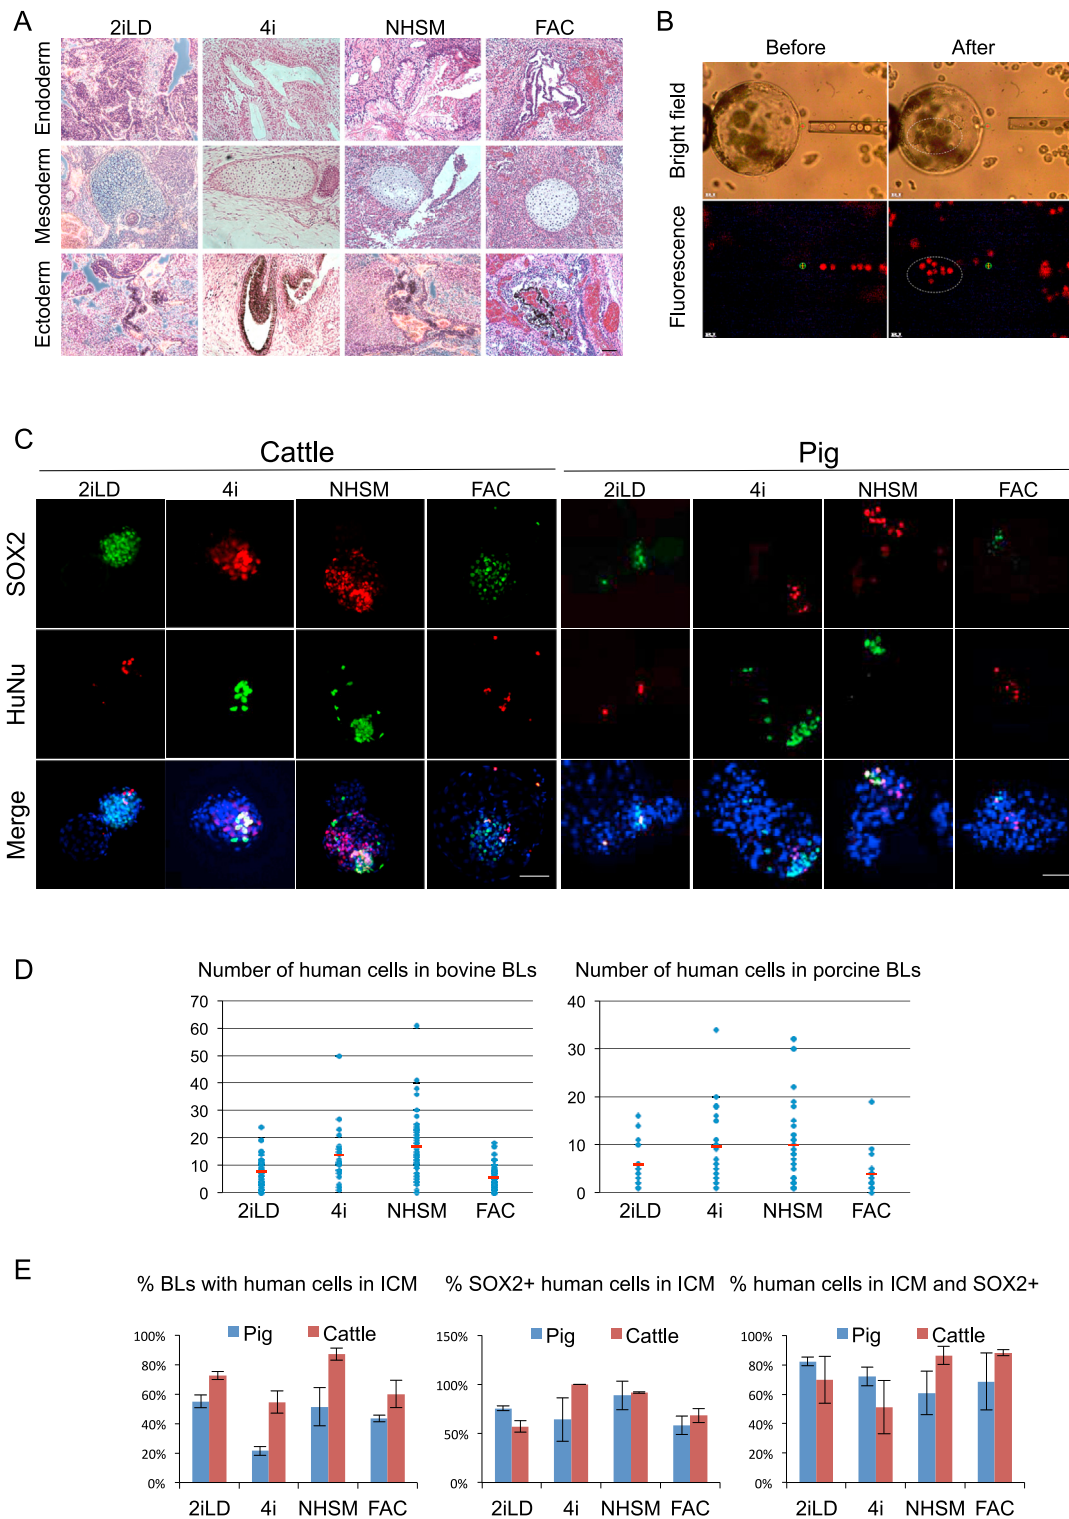

**Figure S3. Teratoma Assay and Interspecies ICM Incorporation of Different Types of hiPSCs to Cattle and Pig Blastocysts, Related to Figure 4**

(A) Representative images showing hematoxylin and eosin staining of histological sections derived from teratomas generated by 2iLD-hiPSCs, 4i-hiPSCs, NHSM-hiPSCs and FAC-hiPSCs. hiPSC-derived teratomas contained tissues from all three germlineages: endoderm (top), mesoderm (middle) and ectoderm (bottom). Scale bar is 100  $\mu$ m.

(legend continued on next page)

---

(B) Laser-assisted microinjection of hiPSCs into a bovine blastocyst. Left, before injection laser beam was used to perforate the zona pellucida. Right, a blunt end pipette was used to transfer hiPSCs to the blastocoel. Red color indicates hKO-labeled hiPSCs (bottom).

(C) Representative immunofluorescence images showing ICM incorporation of naive and intermediate hiPSCs. Top, SOX2; Middle, HuNu, Bottom, merged images. Blue, DAPI. Scale bar is 100  $\mu$ m.

(D) Number of hiPSCs remained in the cattle (left) and pig (right) blastocysts after injection of 10 hiPSCs followed by 2 days in vitro culture. Red line, average number of cells. Blue dot, number of ICM-incorporated hiPSCs in each blastocyst. BL, blastocyst.

(E) Comparison of several parameters of ICM incorporation for each type of hiPSCs between pig and cattle. Error bars indicate s.d.

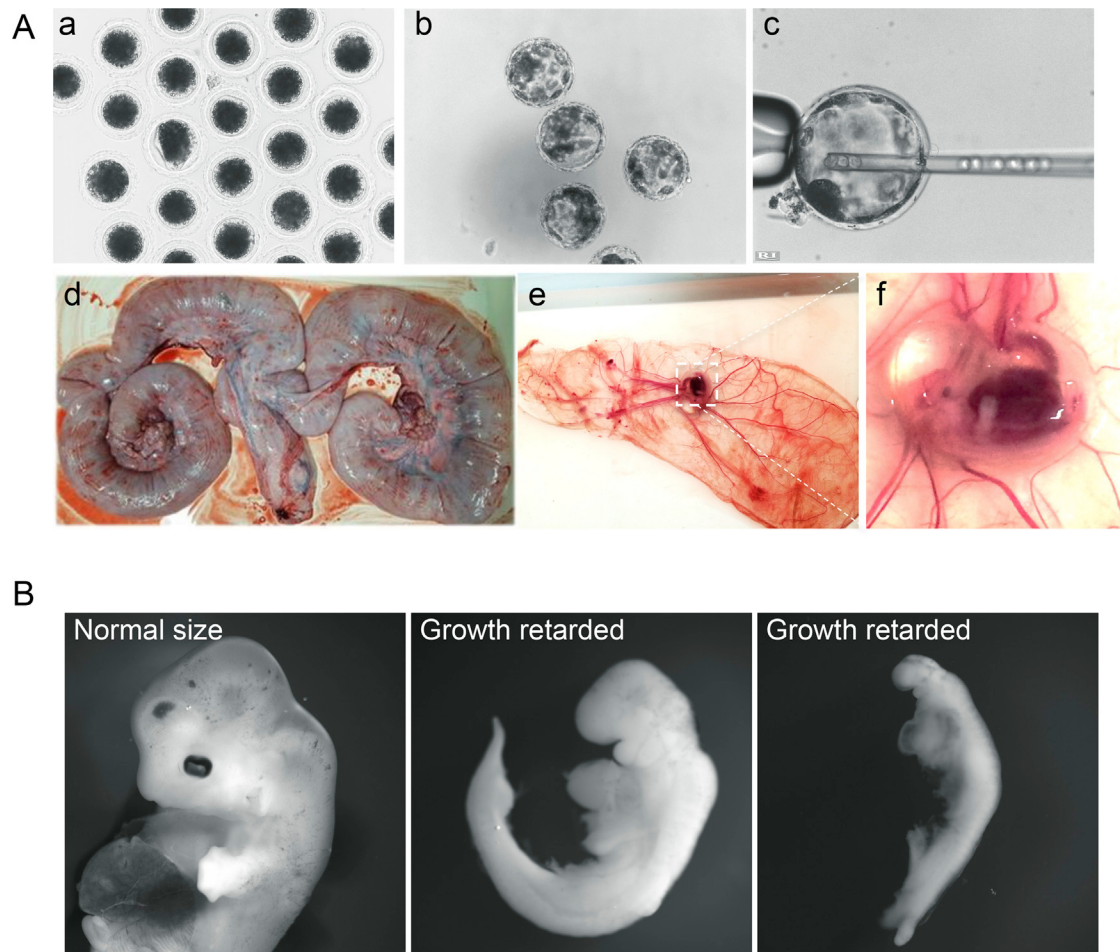

**Figure S4. Generation of Post-implantation Pig Embryos Derived from Blastocyst Injection of hiPSCs, Related to Figure 5**

(A) Representative bright field images showing: a) freshly collected pig zygotes; b) in vitro derived pig blastocysts; c) hiPSCs are being injected into a pig blastocyst; d) Pig female reproductive tract at day-28 of pregnancy; e) a day 28 pig conceptus displaying the embryo proper and the amniotic and allantoic membranes; f) a magnified image of the day-28 pig embryo showing in e.

(B) Representative bright field images showing a normal size day-28 pig embryo (left) and growth retarded day-28 embryos (middle and right).

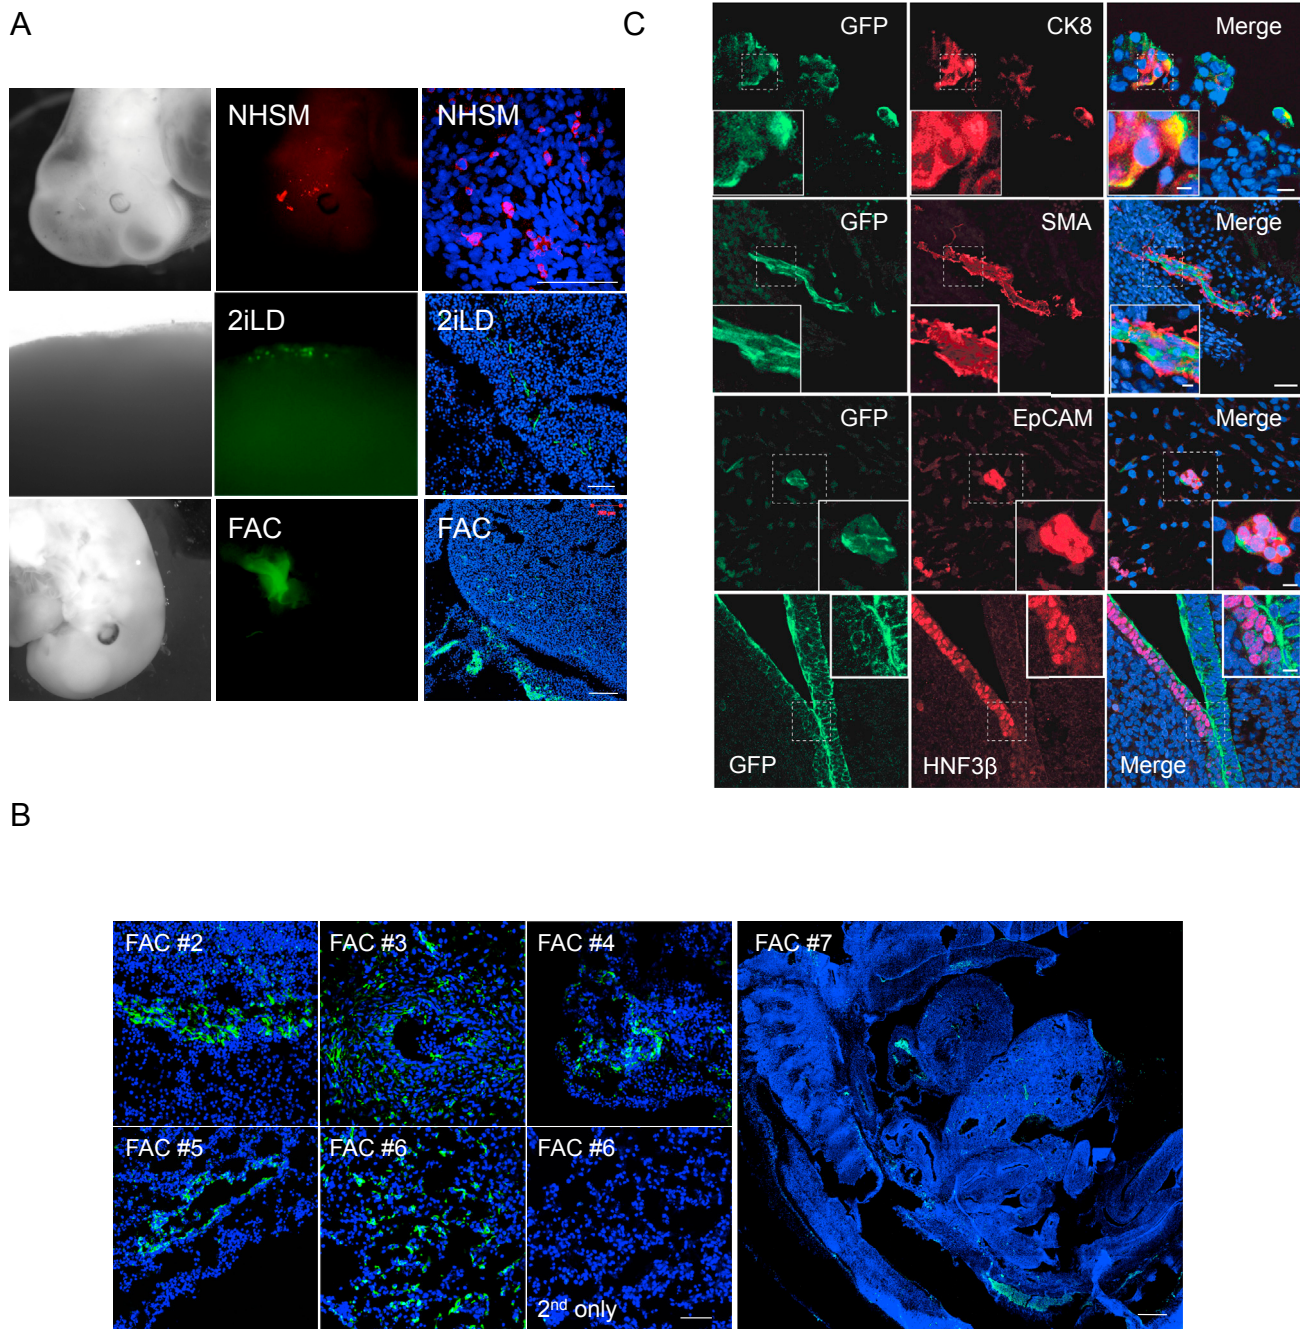

**Figure S5. Chimeric Contribution of hiPSCs to Post-implantation Pig Embryos, Related to Figure 6**

(A) Representative bright field (left), fluorescence (middle) and immunofluorescence (right) images showing the contribution of hKO-labeled NHSM-hiSPCs, GFP-labeled 2iLD-hiSPCs and FAC-hiSPCs to normal size day 28 pig embryos. Scale bar is 200  $\mu$ m.

(B) Representative immunofluorescence images showing the contribution of FAC-hiSPCs to six additional normal size day 21-28 pig embryos (FAC #2-#7). Scale bar is 200  $\mu$ m.

(C) Representative immunofluorescence images showing the chimeric contribution and differentiation of FAC-hiSPCs within a normal size, day 28 pig embryo (FAC #3). Embryo sections were stained with antibodies against GFP (green, left), EpiCAM, HNF3 $\beta$ , CK8 and SMA (red, middle). Right, merged images. Insets are higher magnification images of boxed regions. Scale bar is 100  $\mu$ m.
